1 **TEAD4/YAP1/WWTR1 prevent the premature onset of pluripotency prior to the 16-**  
2 **cell stage**

3

4 Tristan Frum<sup>1</sup>, Jennifer Watts<sup>2,3</sup>, and Amy Ralston<sup>1,3#</sup>

5

6 <sup>1</sup>Department of Biochemistry and Molecular Biology, Michigan State University, East  
7 Lansing, Michigan, 48824, United States.

8

9 <sup>2</sup>Physiology Graduate Program, Michigan State University, East Lansing, Michigan,  
10 48824, United States.

11

12 <sup>3</sup>Reproductive and Developmental Biology Training Program, Michigan State University,  
13 East Lansing, Michigan, 48824, United States.

14

15 #) Correspondence: [aralston@msu.edu](mailto:aralston@msu.edu)

16

17 **Running title:** Mechanism preventing premature Sox2

18

19 **Key words:** preimplantation, stem cell progenitors, HIPPO signaling

20

## 21 **Abstract**

22 In the mouse embryo, pluripotent cells arise inside the embryo around the 16-cell stage.  
23 During these early stages, *Sox2* is the only gene whose expression is known to be  
24 induced specifically within inside cells as they are established. To understand how  
25 pluripotent cells are created, we investigated the mechanisms regulating the initial  
26 activation of *Sox2* expression. Surprisingly, *Sox2* expression initiated normally in the  
27 absence of both *Nanog* and *Oct4*, highlighting differences between embryo and stem  
28 cell models of pluripotency. However, we observed precocious, ectopic expression of  
29 *Sox2* prior to the 16-cell stage in the absence of *Yap1*, *Wwtr1*, and *Tead4*. Interestingly,  
30 the repression of premature *Sox2* expression was sensitive to LATS1/2 activity, even  
31 though it normally does not limit TEAD4/YAP1/WWTR1 activity during these early  
32 stages. Finally, we present evidence for direct transcriptional repression of *Sox2* by  
33 YAP1/WWTR1/TEAD4. Taken together, our observations reveal that, while embryos are  
34 initially competent to express *Sox2* as early as the 4-cell stage, transcriptional  
35 repression prevents the premature expression of *Sox2*, thereby restricting the  
36 pluripotency program to the stage when inside cells are first created.

37

## 38 **Introduction**

39 Pluripotency describes the developmental potential to produce all adult cell types.  
40 However, in mammals, the establishment of pluripotency takes place in the context of  
41 lineage decisions that separate pluripotent cells of the fetus from cells that give rise to  
42 extraembryonic tissues such as the placenta. Thus, in mammals, the onset of  
43 pluripotency is initially delayed as the blastomeres transition from totipotency to adopt  
44 the more specialized pluripotent and extraembryonic states.

45

46 The mouse embryo has provided an invaluable tool to understand the molecular  
47 mechanisms that initially create pluripotent cells, which are also the progenitors of  
48 embryonic stem cells. While much progress has been made in understanding how  
49 pluripotency is maintained once pluripotent cells are established, the mechanisms  
50 driving the initial establishment of pluripotency remain relatively obscure.

51

52 In the mouse embryo, pluripotent cells emerge from cells positioned inside the embryo,  
53 which occurs around the 16-cell stage, and continues as the inside cells form the inner  
54 cell mass of the blastocyst. The inner cell mass will go on to differentiate into either  
55 pluripotent epiblast or non-pluripotent primitive endoderm. As the epiblast matures, it  
56 gradually acquires a more embryonic stem cell-like transcriptional signature (Boroviak et  
57 al., 2014; Boroviak et al., 2015).

58  
59 While studies in mammalian embryos and embryonic stem cells have developed an  
60 extensive catalog of transcription factors that promote pluripotency, the only  
61 pluripotency-promoting transcription factor known to distinguish inside cells as they form  
62 at the 16-cell stage is *Sox2* (Guo et al., 2010; Wicklow et al., 2014). Therefore,  
63 understanding how *Sox2* expression is regulated at the 16-cell stage can provide insight  
64 into how pluripotency is first established.

65  
66 Here, we use genetic approaches to test mechanistic models of the initial activation  
67 *Sox2* expression. We investigate the contribution, at the 16-cell stage and prior, of  
68 factors and pathways that are known to regulate expression of *Sox2* at later  
69 preimplantation stages and in embryonic stem cells. We show that embryos are  
70 competent to express *Sox2* as early as the four-cell stage, although they normally do  
71 not do so. Finally, we uncover the molecular mechanisms that ensure that *Sox2*  
72 expression remains repressed until the developmentally appropriate stage.

73

## 74 **Results and Discussion**

75

### 76 **The initiation of *Sox2* expression is *Nanog*- and *Oct4*-independent**

77 To identify mechanisms contributing to the onset of *Sox2* expression in the embryo, we  
78 first focused on the role of transcription factors that are required for *Sox2* expression in  
79 embryonic stem cells. The core pluripotency genes *Nanog* and *Oct4* (*Pou5f1*) are  
80 required for *Sox2* expression in embryonic stem cells (Chambers et al., 2003; Mitsui et  
81 al., 2003; Niwa et al., 2005) and are expressed at the 8-cell stage (Dietrich and Hiragi,  
82 2007; Palmieri et al., 1994; Rosner et al., 1990; Strumpf et al., 2005), prior to the onset

83 of *Sox2* expression at the 16-cell stage, suggesting that NANOG and OCT4 could  
84 activate the initial expression of *Sox2*.

85  
86 We previously showed that the initiation of *Sox2* expression is *Oct4*-independent, as  
87 embryos lacking *Oct4* have normal levels of *Sox2* expression at E3.5 (Frum et al.,  
88 2013). We therefore hypothesized that *Nanog* and *Oct4* could act redundantly to initiate  
89 *Sox2* expression. To test this hypothesis, we bred mice carrying the null allele *Nanog*-  
90 *GFP* (Maherali et al., 2007) with mice carrying an *Oct4* null allele (Kehler et al., 2004) to  
91 generate *Nanog;Oct4* null embryos (Fig. S1A). In wild-type embryos, *Sox2* is first  
92 detected in inside cells at the 16-cell stage, with increasing robustness in inside cells of  
93 the 32-cell stage embryo (Guo et al., 2010; Wicklow et al., 2014). In *Nanog;Oct4* null  
94 embryos, SOX2 was detectable at the 16-cell (E3.0) and 32-cell (E3.25) stages (Fig.  
95 1A-B). We observed no differences in the proportions of SOX2-expressing cells at the  
96 16- and 32-cell stages between non-mutant embryos and embryos lacking *Nanog*, *Oct4*,  
97 or both (Fig. S1B,C). These observations indicate that *Nanog* and *Oct4* do not regulate  
98 initial *Sox2* expression.

99

### 100 ***Nanog* and *Oct4* are individually required to maintain *Sox2* expression**

101 To investigate a role for *Nanog* and *Oct4* in maintaining expression of *Sox2*, we  
102 evaluated double null embryos at a later time point. By E3.5, SOX2 appeared weak or  
103 undetectable in most cells of *Nanog;Oct4* null embryos (Fig. 1C). Moreover, the  
104 proportion of cells expressing the wild type level of SOX2 was significantly lower in  
105 *Nanog;Oct4* null embryos (Fig. 1D), but not in embryos lacking *Nanog* or *Oct4* only (Fig.  
106 S1D). We therefore conclude that *Nanog* and *Oct4* work together to maintain *Sox2*  
107 expression and can compensate for the loss of one another up to at least E3.5.

108

109 To evaluate whether *Nanog* and *Oct4* cooperatively maintain *Sox2* expression at later  
110 preimplantation stages, we examined SOX2 expression in embryos lacking either  
111 *Nanog* or *Oct4* at later developmental stages. At E3.75, SOX2 levels were  
112 indistinguishable between non-mutant, *Nanog* null and *Oct4* null embryos (Fig 1E,F). In  
113 fact, the only difference between non-mutant, *Oct4* null and *Nanog* null embryos at this



114 timepoint was the previously reported failure of *Nanog* null embryos to undergo primitive  
115 endoderm differentiation by downregulating *Nanog* expression in a subset of inner mass  
116 cells (Frankenberg et al., 2011; Messerschmidt and Kemler, 2010).

117

118 By contrast, both *Nanog* null and *Oct4* null embryos exhibited defects in SOX2 by  
119 E4.25. *Nanog* null embryos exhibited the more severe SOX2 expression phenotype,  
120 with almost undetectable SOX2 (Fig. 1G). *Oct4* null embryos exhibited a less severe  
121 phenotype, with reduced, but detectable SOX2 (Fig. 1H). These observations indicate  
122 that, while the initial phase of *Sox2* expression is independent of *Nanog* and *Oct4*, this  
123 is followed by a period during which *Nanog* and *Oct4* act redundantly to maintain *Sox2*  
124 expression, which then gives way to a phase during which *Nanog* and *Oct4* are  
125 individually required to achieve maximal *Sox2* expression.

126

### 127 **TEAD4/WWTR1/YAP1 regulate the onset of *Sox2* expression**

128 Having observed that the initiation of *Sox2* expression is *Nanog*- and *Oct4*-independent,  
129 we next examined the role of other factors in regulating initial *Sox2* expression. TEAD4  
130 and its co-factors WWTR1 and YAP1 repress *Sox2* expression in outside cells starting  
131 around the 16-cell stage (Frum et al., 2018; Wicklow et al., 2014). However, YAP1 is  
132 detected within nuclei as early as the 4-cell stage (Nishioka et al., 2009), suggesting  
133 that the complex is active prior to the 16-cell stage. Recent studies have highlighted the  
134 roles and regulation of TEAD4/WWTR1/YAP1 in promoting outside cell maturation to  
135 trophectoderm during blastocyst formation (Anani et al., 2014; Cao et al., 2015;  
136 Cockburn et al., 2013; Hirate et al., 2013; Kono et al., 2014; Leung and Zernicka-Goetz,  
137 2013; Lorthongpanich et al., 2013; Nishioka et al., 2009; Nishioka et al., 2008; Posfai et  
138 al., 2017; Rayon et al., 2014; Shi et al., 2017; Yagi et al., 2007; Yu et al., 2016). Yet, the  
139 developmental requirement for TEAD4/WWTR1/YAP1 prior to the 16-cell stage has not  
140 been investigated. We therefore hypothesized that TEAD4/WWTR1/YAP1 repress *Sox2*  
141 expression prior to the 16-cell stage.

142

143 To test this hypothesis, we examined SOX2 in embryos lacking *Tead4*. Consistent with  
144 our hypothesis, *Tead4* null embryos exhibited precocious SOX2 at the 8-cell stage (Fig.

145 2A,C). Notably, this phenotype that was not exacerbated by elimination of maternal  
146 *Tead4* (Fig. S2A and Fig. 2A,C), consistent with the absence of detectable *Tead4* in  
147 oocytes (Yagi et al., 2007). By contrast, deletion of maternal *Wwtr1* and *Yap1* (Fig. S2B)  
148 led to precocious SOX2 at the 8-cell stage (Fig. 2B,D). The presence of wild-type,  
149 paternal alleles of *Wwtr1* and/or *Yap1* did not rescue SOX2 in the maternally null  
150 embryos (Fig. 2B, D). Therefore, maternally provided WWTR1/YAP1 and zygotically  
151 expressed TEAD4 repress *Sox2* expression at the 8-cell stage.

152

153 We next evaluated SOX2 in embryos lacking maternal *Wwtr1;Yap1* at the 4-cell stage.  
154 We observed that 4-cell embryos lacking maternal *Wwtr1* and *Yap1* occasionally  
155 exhibited weak ectopic SOX2 (Fig. S2D,E). However, SOX2 was never detected in 4-  
156 cell embryos lacking *Tead4* (Fig. S2C). These observations suggest that *Wwtr1* and  
157 *Yap1* partner with other factors to regulate the onset of *Sox2* expression at the 4-cell  
158 stage and point to a requirement for other TEAD proteins that are expressed at the 4-  
159 cell stage (Nishioka et al., 2008).

160

161 The premature onset of *Sox2* expression in embryos lacking *Tead4* or *Wwtr1* and *Yap1*  
162 demonstrates that preimplantation mouse embryos are capable of expressing markers  
163 of inside cell identity as early as the 4-cell stage and reveals an earlier than expected  
164 role for TEAD4/WWTR1/YAP1 in repressing the expression of *Sox2* until the formation  
165 of inside cells, thus permitting the establishment of discrete trophectoderm and inner  
166 cell mass gene expression. Furthermore, the appearance of *Sox2* expression prior to  
167 the formation of inside cells argues that no cues specific to inside-position are required  
168 for *Sox2* expression beyond regulated TEAD4/WWTR1/YAP1 activity. Rather, our  
169 results suggest that the mechanism regulating the onset of *Sox2* expression is that  
170 constitutive repression of *Sox2* by TEAD4/WWTR1/YAP1 is relieved once cells are  
171 positioned inside the embryo at the 16-cell stage.

172

### 173 **Repression of *Sox2* at the 4- and 8-cell stage is sensitive to LATS2 kinase**

174 In many contexts, TEAD4/WWTR1/YAP1 activity is repressed by the HIPPO pathway  
175 LATS1/2 kinases, which repress nuclear localization of WWTR1/YAP1 (Nishioka et al.,

176 2009; Zhao et al., 2010; Zhao et al., 2007). To evaluate the role of HIPPO signaling in  
177 regulating initial *Sox2* expression, we therefore examined whether *Sox2* expression is  
178 LATS1/2-sensitive prior to the 16-cell stage.

179  
180 We injected mRNA encoding *Lats2* into both blastomeres of 2-cell stage embryos,  
181 which is sufficient to inactivate the TEAD4/WWTR1/YAP1 complex during blastocyst  
182 formation (Nishioka et al., 2009; Wicklow et al., 2014), and then evaluated SOX2 at 4-  
183 and 8-cell stages (Fig. 3A). As anticipated, *Lats2* mRNA injection, but not injection of  
184 *Green Fluorescent Protein* mRNA, greatly reduced YAP1 nuclear localization at 4- and  
185 8-cell stages (Fig. 3B,C). In addition, we observed precocious SOX2 in embryos  
186 overexpressing *Lats2* (Fig 3B,C). Therefore, LATS kinases can prevent  
187 TEAD4/WWTR1/YAP1 from repressing expression of *Sox2* prior to the 16-cell stage,  
188 but LATS kinases must not normally do so, since *Sox2* is usually repressed during early  
189 development.

190  
191 We observed in published RNA-seq data sets that *Lats1* and *Lats2* are expressed in 4-  
192 cell and 8-cell stage embryos (Tang et al., 2010; Wu et al., 2016), opening an  
193 interesting future direction of discovering how TEAD4/WWTR1/YAP1 escape inhibition  
194 by LATS kinases prior to the 16-cell stage, which is not currently understood.

195  
196 **TEAD4/WWTR1/YAP1 may repress *Sox2* expression through a direct mechanism**

197 While the TEAD4/WWTR1/YAP1 complex is widely recognized as a transcriptional  
198 activator, it has more recently been shown to act as a transcriptional repressor (Beyer et  
199 al., 2013; Kim et al., 2015). Therefore, we considered two mechanisms by which  
200 TEAD4/WWTR1/YAP1 could repress *Sox2* expression (Fig. 4A): an indirect model, in  
201 which TEAD4/WWTR1/YAP1 promote transcription of a *Sox2* repressor, and a direct  
202 model, in which TEAD4/WWTR1/YAP1 themselves act as the *Sox2* repressor.

203  
204 To test these models, we employed variants of *Tead4* in which the WWTR1/YAP1  
205 interaction domain has been replaced with either the transcriptional activator VP16  
206 (*Tead4VP16*) or the transcriptional repressor engrailed (*Tead4EnR*). These variants

207 have previously been used in preimplantation embryos to provide evidence that  
208 TEAD4/WWTR1/YAP1 promote *Cdx2* expression through a direct mechanism (Nishioka  
209 et al., 2009). We reasoned that if TEAD4/WWTR1/YAP1 represses *Sox2* indirectly, then  
210 overexpression of *Tead4EnR* would induce *Sox2* expression. Alternatively, if  
211 TEAD4/WWTR1/YAP1 represses *Sox2* directly, then *Tead4VP16* would induce *Sox2*  
212 expression. We injected mRNA encoding *Tead4VP16* or *Tead4EnR* into a single  
213 blastomere of 4-cell stage embryos and tracked progeny of the injected blastomere at  
214 the 8-cell stage with co-injection of *GFP* (Fig. 4B). We observed that overexpression of  
215 *Tead4VP16*, but not *Tead4EnR* induced SOX2 (Fig. 4C,D). These observations are  
216 consistent with the direct repression of *Sox2* by TEAD4/WWTR1/YAP1.

217  
218 This study highlights distinct phases of *Sox2* regulation occurring during the  
219 establishment of pluripotency in mouse development. As early as the 4-cell stage,  
220 blastomeres are competent to express *Sox2*, but this is overridden by  
221 TEAD/WWTR1/YAP1 (Fig. 4E, box 1). Initiation of *Sox2* expression is independent of  
222 *Nanog* and *Oct4* and does not require cues associated with inside cell position or  
223 developmental time. Instead, LATS1/2 activity in inside cells relieves repression of  
224 TEAD4/WWTR1/YAP1 on *Sox2* (Fig. 4E, box 2). After blastocyst formation, NANOG  
225 and OCT4 work together ensure that *Sox2* expression is maintained (Fig 4E, box 3).  
226 Finally, as the embryo approaches implantation, *Nanog* and *Oct4* become individually  
227 required to sustain *Sox2* expression (Fig. 4E, box 4).

228

## 229 **Figure Legends**

230

231 **Figure 1. *Nanog* and *Oct4* are required for the maintenance, but not the initiation**  
232 **of *Sox2*.** (A) Immunostaining for SOX2, E-Cadherin (ECAD), and DNA in non-mutant  
233 and *Nanog;Oct4* null embryos at the 16-cell stage (E3.0). (B) SOX2, ECAD, and DNA in  
234 non-mutant and *Nanog;Oct4* null embryos at the 32-cell stage (E3.25). (C) SOX2 in  
235 non-mutant and *Nanog;Oct4* null embryos at E3.5. (D) Quantification of the percentage  
236 of inside cells, across all embryos, with intense SOX2 staining in non-mutant and  
237 *Nanog;Oct4* null embryos at E3.5. Columns = mean, error bars = standard deviation, p

238 = Student's t-test. (E) NANOG-GFP, SOX2, and DNA in non-mutant and *Nanog* null  
239 embryos at E3.75. (F) NANOG, SOX2, and DNA in non-mutant and *Oct4* null embryos  
240 at E3.75. (G) NANOG-GFP, SOX2, and DNA in non-mutant and *Nanog* null embryos at  
241 E4.25. (H) NANOG, SOX2, and DNA in non-mutant and *Oct4* null embryos at E4.25.  
242 For all panels, n = number of embryos examined. Dashed white lines demarcate non-  
243 epiblast/presumptive primitive endoderm cells.

244

245 **Figure 2. TEAD4/WWTR1/YAP1 repress precocious Sox2 expression at the 8-cell**  
246 **stage.** (A) Immunostaining for SOX2 in non-mutant, *Tead4* zygotic (z) null and *Tead4*  
247 maternal-zygotic (mz) null embryos at the 8-cell stage. (B) SOX2 in embryos lacking m  
248 *Wwtr1* and *Yap1* at the 8-cell stage, with indicated zygotic genotypes. (C) The  
249 percentage of SOX2-positive cells per embryo (dots) in non-mutant, *Tead4* z null and  
250 *Tead4* mz null embryos. (D) The percentage of SOX2-positive cells per embryo (dots) in  
251 *Wwtr1/Yap1* m null embryos with indicated zygotic genotype. Dashed line = mean, p =  
252 one-way ANOVA with Tukey post-hoc test, n = number of embryos examined.

253

254 **Figure 3. YAP1 localization and Sox2 expression are sensitive to LATS2 kinase.**  
255 (A) Experimental approach: both blastomeres of 2-cell stage embryos were injected with  
256 either 500 ng/μl *NLS-GFP* mRNA, which encodes GFP bearing a nuclear localization  
257 sequence (NLS), or 500 ng/μl *Lats2* mRNA, and were then cultured to the 4- or 8-cell  
258 stages. (B) YAP1 and SOX2 immunostaining in 4-cell stage embryos injected with *NLS-*  
259 *GFP* mRNA or *Lats2* mRNA. (C) YAP1 and SOX2 in 8-cell stage embryos injected with  
260 *NLS-GFP* mRNA or *Lats2* mRNA. (D) Dot-plot of the percentage of SOX2-positive cells  
261 per embryo (dots) at the indicated stages. The means and standard deviations are  
262 represented by columns and error bars, while n = number of embryos examined.

263

264 **Figure 4. TEAD4/WWTR1/YAP1 repress Sox2 expression through a direct**  
265 **mechanism.** (A) Models for indirect and direct repression of *Sox2* by  
266 TEAD4/WWTR1/YAP1 and predicted effect of *Tead4EnR* and *Tead4VP16* on *Sox2*  
267 expression. (B) Experimental approach: a single blastomere of each 4-cell embryo was  
268 injected with 150 ng/μl *NLS-GFP* mRNA and either 150 ng/μl *Tead4VP16* or *Tead4EnR*

269 mRNA, and then cultured to the 8-cell stage. (C) GFP and SOX2 immunostaining in  
270 embryos injected with *Tead4VP16* or *Tead4EnR*. (D) Quantification of the percentage of  
271 NLS-GFP-positive, SOX2-positive cells per embryo (dots) injected with *Tead4VP16* and  
272 *Tead4EnR*.  $p$  = student's t-test,  $n$  = number of embryos examined. (E) Model for  
273 regulation of *Sox2* at indicated developmental stages. ICM = inner cell mass, TE =  
274 trophectoderm, EPI = epiblast, PE = primitive endoderm.

275

## 276 **Materials and Methods**

277

### 278 **Mouse strains**

279 Animal care and husbandry was performed in accordance with the guidelines  
280 established by the Institutional Animal Care and Use Committee at Michigan State  
281 University. Wild type embryos were generated by mating CD-1 mice (Charles River).  
282 Female mice used in this study were between six weeks and six months of age and  
283 males were used from eight weeks to nine months. Alleles and transgenes used in this  
284 study were maintained on a CD-1 background and include: *Nanog*<sup>*tm1.1Hoch*</sup> (Maherali et  
285 al., 2007), *Pou5f1*<sup>*tm1Scho*</sup> (Kehler et al., 2004), *Tead4*<sup>*tm1Bnno*</sup> (Yagi et al., 2007),  
286 *Yap1*<sup>*tm1.1Eno*</sup> (Xin et al., 2011), *Wwtr1*<sup>*tm1.1Eno*</sup> (Xin et al., 2013), *Tg(Zp3-cre)93Kw* (De  
287 Vries et al., 2004). Conditional, floxed alleles were recombined to generate null alleles  
288 by breeding mice carrying conditional alleles to *Alpl*<sup>*tm(cre)Nagy*</sup> (Lomelí et al., 2000) mice.

289

### 290 **Embryo collection and culture**

291 Embryos were collected from naturally mated mice by flushing dissected oviducts or  
292 uteri with M2 medium (Millipore-Sigma). All embryos were cultured in 5% CO<sub>2</sub> at 37°C  
293 under ES cell grade mineral oil (Millipore-Sigma). Prior to embryo culture, KSOM  
294 medium (Millipore-Sigma) was equilibrated overnight in the embryo incubator.

295

### 296 **Embryo microinjection**

297 cDNAs encoding *Lats2*, *Tead4VP16*, and *Tead4EnR* (Nishioka et al., 2009) cloned into  
298 the pcDNA3.1 poly(A)<sub>83</sub> plasmid (Yamagata et al., 2005) were linearized, and then  
299 used as a template to generate mRNAs for injection by the mMessage mMachine T7



300 transcription kit (Invitrogen). *NLS-GFP* mRNA was synthesized from linearized *NLS-*  
301 *GFP* plasmid (Ariotti et al., 2015) using the mMessage mMachine Sp6 transcription kit  
302 (Invitrogen). Prior to injection, synthesized mRNAs were cleaned and concentrated  
303 using the MEGAclean Transcription Clean-up Kit (Invitrogen). *Lats2* and *NLS-GFP*  
304 mRNAs were injected into both blastomeres of 2-cell stage embryos at a concentration  
305 of 500 ng/ $\mu$ l. *Tead4VP16* or *Tead4EnR* mRNAs were injected into a single blastomere  
306 of 4-cell stage embryos at a concentration of or 150 ng/ $\mu$ l each. *NLS-GFP* mRNA was  
307 included in 4-cell stage injections at a concentration of 150 ng/ $\mu$ l to trace the progeny of  
308 the injected blastomere. All mRNAs were diluted in 10 mM Tris-HCl (pH 7.4), 0.1 mM  
309 EDTA. Injections were performed using a Harvard Apparatus PL-100A microinjector.

### 310 **Immunofluorescence and Confocal Microscopy**

311 Embryos were fixed in 4% formaldehyde (Polysciences) for 10 minutes, permeabilized  
312 with 0.5% Triton X-100 (Millipore-Sigma) for 30 minutes and blocked with 10% FBS,  
313 0.1% Triton X-100 for at least 1 hour at room temperature or longer at 4°C. Primary  
314 antibody incubation was performed at 4°C overnight using the following antibodies: goat  
315 anti-SOX2 (Neuromics, GT15098, 1:2000), rabbit anti-NANOG (Reprocell, RCAB002P-  
316 F, 1:400) mouse anti-Tead4 (Abcam, ab58310, 1:1000), mouse anti-YAP (Santa Cruz,  
317 sc101199, 1:200), and rat anti-ECAD (Millipore-Sigma, U3254, 1:500). Anti-SOX2, anti-  
318 TEAD4 and anti-YAP antibodies were validated by the absence of positive staining on  
319 embryos homozygous for null alleles encoding antibody target. Nuclei were labelled  
320 with either DRAQ5 (Cell Signaling Technology) or DAPI (Millipore-Sigma). Antibodies  
321 raised against IgG and coupled to Dylight 488, Cy3 or Alexa Fluor 647 (Jackson  
322 ImmunoResearch) were used to detect primary antibodies. Embryos were imaged on  
323 an Olympus FluoView FV1000 Confocal Laser Scanning Microscope using a 20x  
324 UPlanFLN objective (0.5 NA) and 5x digital zoom. Each embryo was imaged in entirety  
325 using 5  $\mu$ m optical section thickness.

326

### 327 **Image Analysis**

328 Z-stacks obtained from confocal microscopy were analyzed using ImageJ (Schneider et  
329 al., 2012). Each nucleus was identified by DNA stain and then scored for the presence  
330 or absence of SOX2. In Fig. 1A and B, cells were classified as inside or outside on the

331 basis of ECAD localization. For analysis of *Nanog*;*Oct4* null embryos in Fig. 1C,D and  
332 Fig. S1D, SOX2 staining intensity was categorized as intense or weak. Intense SOX2  
333 staining was defined as the level observed in non-mutant embryos, which was uniform  
334 among inside cells. In Fig. 1, S1, 2, and S2, embryo genotypes were not known prior to  
335 analysis. In Fig. 3 and 4 embryos were grouped according to injection performed, and  
336 therefore the researcher was not blind to embryo treatment.

337

### 338 **Embryo Genotyping**

339 For embryos at the 8-cell stage or older, DNA was extracted from fixed embryos after  
340 imaging using the Extract-N-Amp kit (Millipore-Sigma) in a total volume of 10  $\mu$ l. For  
341 embryos at the 4-cell stage, DNA was extracted from fixed embryos in a total volume of  
342 5  $\mu$ l. 1  $\mu$ l of extracted DNA was used as template, with allele specific primers (Table  
343 S1).

344

### 345 **Acknowledgements**

346 We thank members of the Ralston Lab for thoughtful discussion. This work was  
347 supported by National Institutes of Health (R01 GM104009 and R35 GM131759 to A.R.  
348 and T32HD087166 to J.W.).

349

### 350 **Competing Interests**

351 No competing interests declared.

352

### 353 **References**

354

355 **Anani, S., Bhat, S., Honma-Yamanaka, N., Krawchuk, D. and Yamanaka, Y.** (2014).

356 Initiation of Hippo signaling is linked to polarity rather than to cell position in the pre-  
357 implantation mouse embryo. *Development* **141**, 2813–2824.

358 **Ariotti, N., Hall, T. E., Rae, J., Ferguson, C., McMahon, K.-A., Martel, N., Webb, R.**

359 **E., Webb, R. I., Teasdale, R. D. and Parton, R. G.** (2015). Modular Detection of  
360 GFP-Labeled Proteins for Rapid Screening by Electron Microscopy in Cells and  
361 Organisms. *Developmental Cell* **35**, 513–525.



- 362 **Beyer, T. A., Weiss, A., Khomchuk, Y., Huang, K., Ogunjimi, A. A., Varelas, X. and**  
363 **Wrana, J. L.** (2013). Switch enhancers interpret TGF- $\beta$  and Hippo signaling to  
364 control cell fate in human embryonic stem cells. *CellReports* **5**, 1611–1624.
- 365 **Boroviak, T., Loos, R., Bertone, P., Smith, A. and Nichols, J.** (2014). The ability of  
366 inner-cell-mass cells to self-renew as embryonic stem cells is acquired following  
367 epiblast specification. *Nat Cell Biol* **16**, 516–528.
- 368 **Boroviak, T., Loos, R., Lombard, P., Okahara, J., Behr, R., Sasaki, E., Nichols, J.,**  
369 **Smith, A. and Bertone, P.** (2015). Lineage-Specific Profiling Delineates the  
370 Emergence and Progression of Naive Pluripotency in Mammalian Embryogenesis.  
371 *Developmental Cell* **35**, 366–382.
- 372 **Cao, Z., Carey, T. S., Ganguly, A., Wilson, C. A., Paul, S. and Knott, J. G.** (2015).  
373 Transcription factor AP-2 induces early Cdx2 expression and represses HIPPO  
374 signaling to specify the trophectoderm lineage. *Development* **142**, 1606–1615.
- 375 **Chambers, I., Colby, D., Robertson, M., Nichols, J., Lee, S., Tweedie, S. and Smith,**  
376 **A.** (2003). Functional expression cloning of Nanog, a pluripotency sustaining factor  
377 in embryonic stem cells. *Cell* **113**, 643–655.
- 378 **Cockburn, K., Biechele, S., Garner, J. and Rossant, J.** (2013). The Hippo Pathway  
379 Member Nf2 Is Required for Inner Cell Mass Specification. *Current Biology* **23**,  
380 1195–1201.
- 381 **De Vries, W. N., Evsikov, A. V., Haac, B. E., Fancher, K. S., Holbrook, A. E.,**  
382 **Kemler, R., Solter, D. and Knowles, B. B.** (2004). Maternal beta-catenin and E-  
383 cadherin in mouse development. *Development* **131**, 4435–4445.
- 384 **Dietrich, J. E. and Hiiragi, T.** (2007). Stochastic patterning in the mouse pre-  
385 implantation embryo. *Development* **134**, 4219–4231.
- 386 **Frankenberg, S., Gerbe, F., Bessonard, S., Belville, C., Pouchin, P., Bardot, O.**  
387 **and Chazaud, C.** (2011). Primitive Endoderm Differentiates via a Three-Step

- 388 Mechanism Involving Nanog and RTK Signaling. *Developmental Cell* **21**, 1005–  
389 1013.
- 390 **Frum, T., Halbisen, M. A., Wang, C., Amiri, H., Robson, P. and Ralston, A.** (2013).  
391 Oct4 Cell-Autonomously Promotes Primitive Endoderm Development in the Mouse  
392 Blastocyst. *Developmental Cell* **25**, 610–622.
- 393 **Frum, T., Murphy, T. M. and Ralston, A.** (2018). HIPPO signaling resolves embryonic  
394 cell fate conflicts during establishment of pluripotency in vivo. *Elife* **7**, 347.
- 395 **Guo, G., Huss, M., Tong, G. Q., Wang, C., Sun, L. L., Clarke, N. D. and Robson, P.**  
396 (2010). Resolution of Cell Fate Decisions Revealed by Single-Cell Gene Expression  
397 Analysis from Zygote to Blastocyst. *Developmental Cell* **18**, 675–685.
- 398 **Hirate, Y., Hirahara, S., Inoue, K.-I., Suzuki, A., Alarcon, V. B., Akimoto, K., Hirai,**  
399 **T., Hara, T., Adachi, M., Chida, K., et al.** (2013). Polarity-Dependent Distribution of  
400 Angiomotin Localizes Hippo Signaling in Preimplantation Embryos. *Current Biology*  
401 **23**, 1181–1194.
- 402 **Kehler, J., Tolkunova, E., Koschorz, B., Pesce, M., Gentile, L., Boiani, M., Lomelí,**  
403 **H., Nagy, A., McLaughlin, K. J., Schöler, H. R., et al.** (2004). Oct4 is required for  
404 primordial germ cell survival. *EMBO Rep* **5**, 1078–1083.
- 405 **Kim, M., Kim, T., Johnson, R. L. and Lim, D.-S.** (2015). Transcriptional co-repressor  
406 function of the hippo pathway transducers YAP and TAZ. *CellReports* **11**, 270–282.
- 407 **Kono, K., Tamashiro, D. A. A. and Alarcon, V. B.** (2014). Inhibition of RHO-ROCK  
408 signaling enhances ICM and suppresses TE characteristics through activation of  
409 Hippo signaling in the mouse blastocyst. *Developmental Biology* **394**, 142–155.
- 410 **Leung, C. Y. and Zernicka-Goetz, M.** (2013). Angiomotin prevents pluripotent lineage  
411 differentiation in mouse embryos via Hippo pathway-dependent and -independent  
412 mechanisms. *Nature Communications* **4**, 1–11.

- 413 **Lomelí, H., Ramos-Mejía, V., Gertsenstein, M., Lobe, C. G. and Nagy, A. (2000).**  
414 Targeted insertion of Cre recombinase into the TNAP gene: excision in primordial  
415 germ cells. *genesis* **26**, 116–117.
- 416 **Lorthongpanich, C., Messerschmidt, D. M., Chan, S. W., Hong, W., Knowles, B. B.**  
417 **and Solter, D. (2013).** Temporal reduction of LATS kinases in the early  
418 preimplantation embryo prevents ICM lineage differentiation. *Genes & Development*  
419 **27**, 1441–1446.
- 420 **Maherali, N., Sridharan, R., Xie, W., Utikal, J., Eminli, S., Arnold, K., Stadtfeld, M.,**  
421 **Yachechko, R., Tchieu, J., Jaenisch, R., et al. (2007).** Directly reprogrammed  
422 fibroblasts show global epigenetic remodeling and widespread tissue contribution.  
423 *Cell Stem Cell* **1**, 55–70.
- 424 **Messerschmidt, D. M. and Kemler, R. (2010).** Nanog is required for primitive  
425 endoderm formation through a non-cell autonomous mechanism. *Developmental*  
426 *Biology* **1–27**.
- 427 **Mitsui, K., Tokuzawa, Y., Itoh, H., Segawa, K., Murakami, M., Takahashi, K.,**  
428 **Maruyama, M., Maeda, M. and Yamanaka, S. (2003).** The homeoprotein Nanog is  
429 required for maintenance of pluripotency in mouse epiblast and ES cells. *Cell* **113**,  
430 631–642.
- 431 **Nishioka, N., Inoue, K.-I., Adachi, K., Kiyonari, H., Ota, M., Ralston, A., Yabuta, N.,**  
432 **Hirahara, S., Stephenson, R. O., Ogonuki, N., et al. (2009).** The Hippo Signaling  
433 Pathway Components Lats and Yap Pattern Tead4 Activity to Distinguish Mouse  
434 Trophectoderm from Inner Cell Mass. *Developmental Cell* **16**, 398–410.
- 435 **Nishioka, N., Yamamoto, S., Kiyonari, H., Sato, H., Sawada, A., Ota, M., Nakao, K.**  
436 **and Sasaki, H. (2008).** Tead4 is required for specification of trophectoderm in pre-  
437 implantation mouse embryos. *Mech. Dev.* **125**, 270–283.

- 438 **Niwa, H., Toyooka, Y., Shimosato, D., Strumpf, D., Takahashi, K., Yagi, R. and**  
439 **Rossant, J.** (2005). Interaction between Oct3/4 and Cdx2 Determines  
440 Trophectoderm Differentiation. *Cell* **123**, 917–929.
- 441 **Palmieri, S. L., Peter, W., Hess, H. and Scholer, H. R.** (1994). Oct-4 transcription  
442 factor is differentially expressed in the mouse embryo during establishment of the  
443 first two extraembryonic cell lineages involved in implantation. *Developmental*  
444 *Biology* **166**, 259–267.
- 445 **Posfai, E., Petropoulos, S., de Barros, F. R. O., Schell, J. P., Jurisica, I., Sandberg,**  
446 **R., Lanner, F. and Rossant, J.** (2017). Position- and Hippo signaling-dependent  
447 plasticity during lineage segregation in the early mouse embryo. *Elife* **6**, e22906.
- 448 **Rayon, T., Menchero, S., Nieto, A., Xenopoulos, P., Crespo, M., Cockburn, K.,**  
449 **Cañon, S., Sasaki, H., Hadjantonakis, A.-K., la Pompa, de, J. L., et al.** (2014).  
450 Notch and hippo converge on Cdx2 to specify the trophectoderm lineage in the  
451 mouse blastocyst. *Developmental Cell* **30**, 410–422.
- 452 **Rosner, M. H., Vigano, M. A., Ozato, K., Timmons, P. M., Poirier, F., Rigby, P. W.**  
453 **and Staudt, L. M.** (1990). A POU-domain transcription factor in early stem cells and  
454 germ cells of the mammalian embryo. *Nature* **345**, 686–692.
- 455 **Schneider, C. A., Rasband, W. S. and Eliceiri, K. W.** (2012). NIH Image to ImageJ: 25  
456 years of image analysis. *Nat Meth* **9**, 671–675.
- 457 **Shi, X., Yin, Z., Ling, B., Wang, L., Liu, C., Ruan, X., Zhang, W. and Chen, L.** (2017).  
458 Rho differentially regulates the Hippo pathway by modulating the interaction  
459 between Amot and Nf2 in the blastocyst. *Development*.
- 460 **Strumpf, D., Mao, C.-A., Yamanaka, Y., Ralston, A., Chawengsaksophak, K., Beck,**  
461 **F. and Rossant, J.** (2005). Cdx2 is required for correct cell fate specification and  
462 differentiation of trophectoderm in the mouse blastocyst. *Development* **132**, 2093–  
463 2102.

- 464 **Tang, F., Barbacioru, C., Bao, S., Lee, C., Nordman, E., Wang, X., Lao, K. and**  
465 **Surani, M. A.** (2010). Tracing the Derivation of Embryonic Stem Cells from the Inner  
466 Cell Mass by Single-Cell RNA-Seq Analysis. *Stem Cell* **6**, 468–478.
- 467 **Wicklow, E., Blij, S., Frum, T., Hirate, Y., Lang, R. A., Sasaki, H. and Ralston, A.**  
468 (2014). HIPPO pathway members restrict SOX2 to the inner cell mass where it  
469 promotes ICM fates in the mouse blastocyst. *PLoS Genetics* **10**, e1004618.
- 470 **Wu, J., Huang, B., Chen, H., Yin, Q., Liu, Y., Xiang, Y., Zhang, B., Liu, B., Wang, Q.,**  
471 **Xia, W., et al.** (2016). The landscape of accessible chromatin in mammalian  
472 preimplantation embryos. *Nature* **534**, 652–657.
- 473 **Xin, M., Kim, Y., Sutherland, L. B., Murakami, M., Qi, X., McAnally, J., Porrello, E.**  
474 **R., Mahmoud, A. I., Tan, W., Shelton, J. M., et al.** (2013). Hippo pathway effector  
475 Yap promotes cardiac regeneration. *Proc. Natl. Acad. Sci. U.S.A.* **110**, 13839–  
476 13844.
- 477 **Xin, M., Kim, Y., Sutherland, L. B., Qi, X., McAnally, J., Schwartz, R. J.,**  
478 **Richardson, J. A., Bassel-Duby, R. and Olson, E. N.** (2011). Regulation of  
479 insulin-like growth factor signaling by Yap governs cardiomyocyte proliferation and  
480 embryonic heart size. *Sci Signal* **4**, ra70–ra70.
- 481 **Yagi, R., Kohn, M. J., Karavanova, I., Kaneko, K. J., Vullhorst, D., DePamphilis, M.**  
482 **L. and Buonanno, A.** (2007). Transcription factor TEAD4 specifies the  
483 trophoctoderm lineage at the beginning of mammalian development. *Development*  
484 **134**, 3827–3836.
- 485 **Yamagata, K., Yamazaki, T., Yamashita, M., Hara, Y., Ogonuki, N. and Ogura, A.**  
486 (2005). Noninvasive visualization of molecular events in the mammalian zygote.  
487 *genesis* **43**, 71–79.
- 488 **Yu, C., Ji, S.-Y., Dang, Y.-J., Sha, Q.-Q., Yuan, Y.-F., Zhou, J.-J., Yan, L.-Y., Qiao, J.,**  
489 **Tang, F. and Fan, H.-Y.** (2016). Oocyte-expressed yes-associated protein is a key  
490 activator of the early zygotic genome in mouse. *Cell Res* **26**, 275–287.

- 491 **Zhao, B., Li, L., Tumaneng, K., Wang, C.-Y. and Guan, K.-L.** (2010). A coordinated  
492 phosphorylation by Lats and CK1 regulates YAP stability through SCF(beta-TRCP).  
493 *Genes & Development* **24**, 72–85.
- 494 **Zhao, B., Wei, X., Li, W., Udan, R. S., Yang, Q., Kim, J., Xie, J., Ikenoue, T., Yu, J.,**  
495 **Li, L., et al.** (2007). Inactivation of YAP oncoprotein by the Hippo pathway is  
496 involved in cell contact inhibition and tissue growth control. *Genes & Development*  
497 **21**, 2747–2761.





Frum et al., 2019 Figure 1

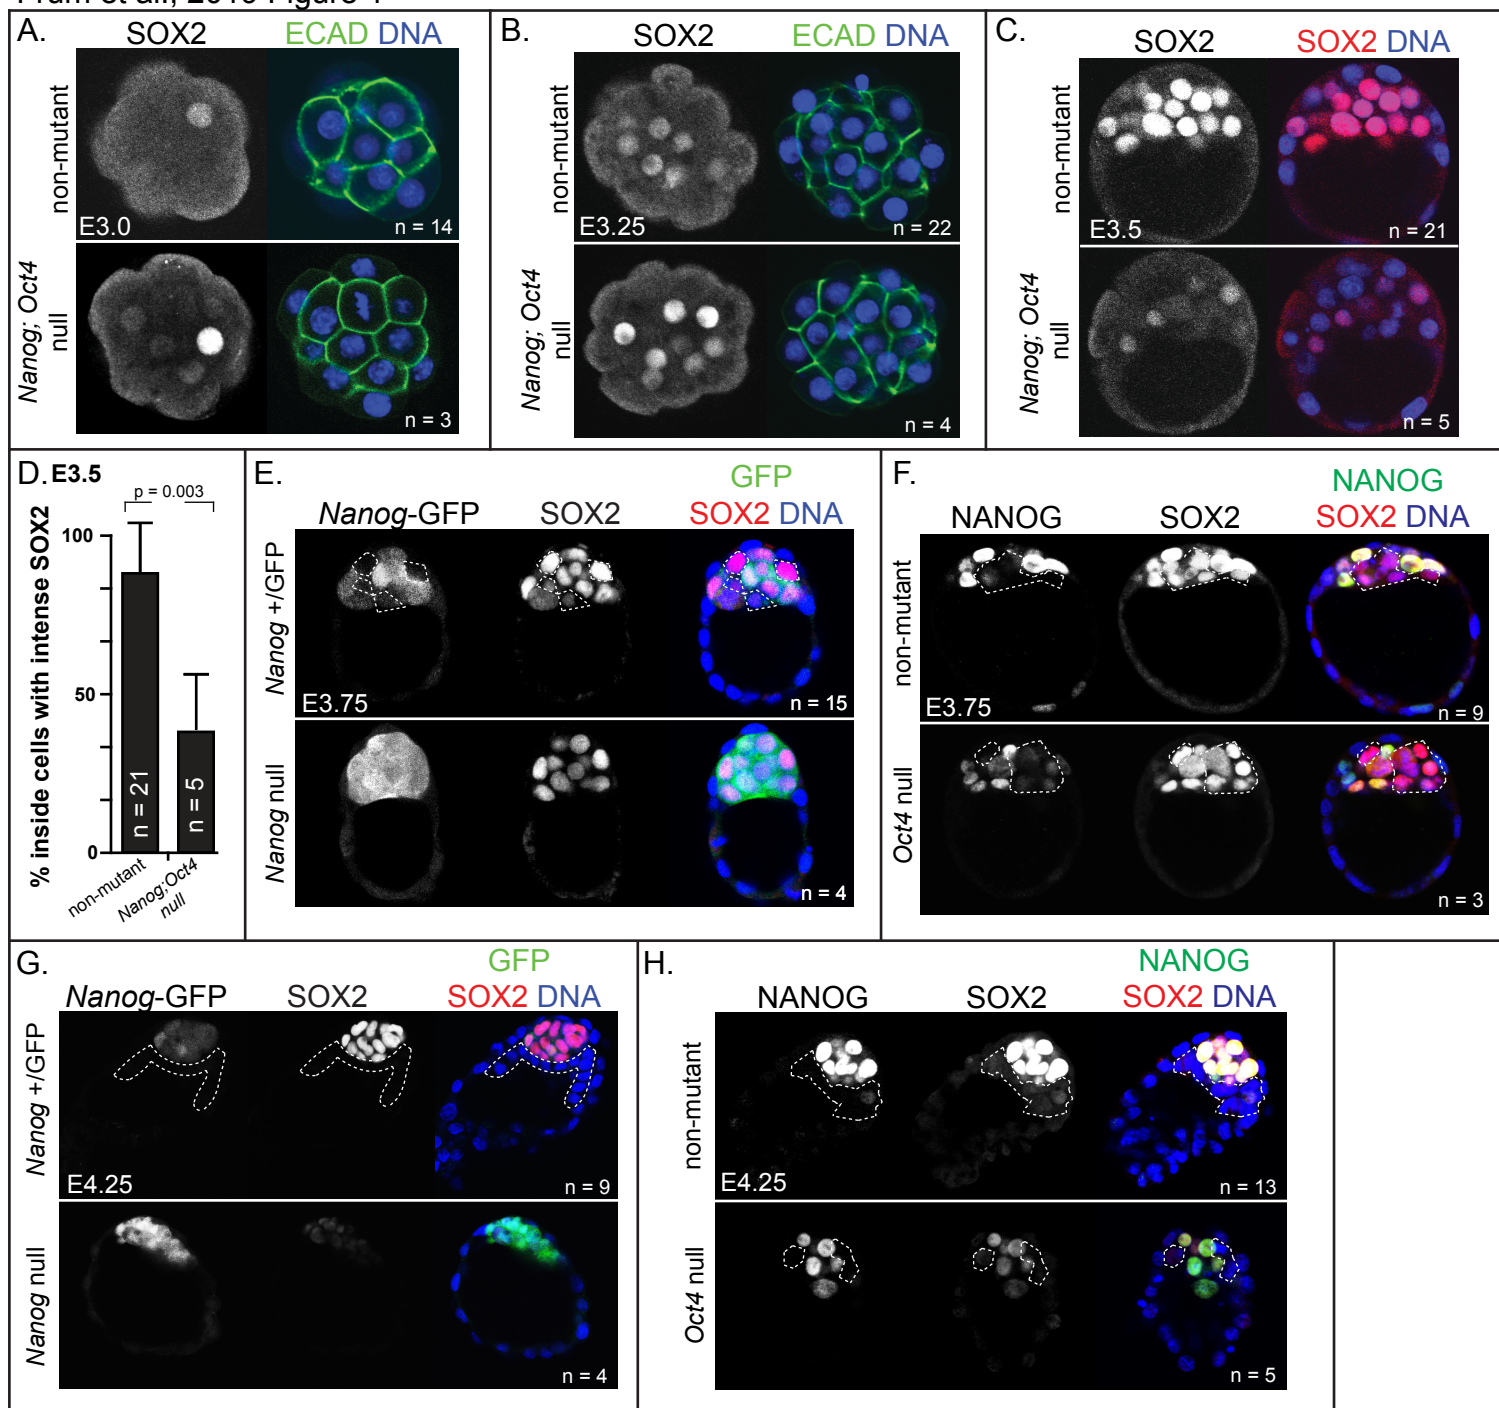



Frum et al., 2019 Figure 2

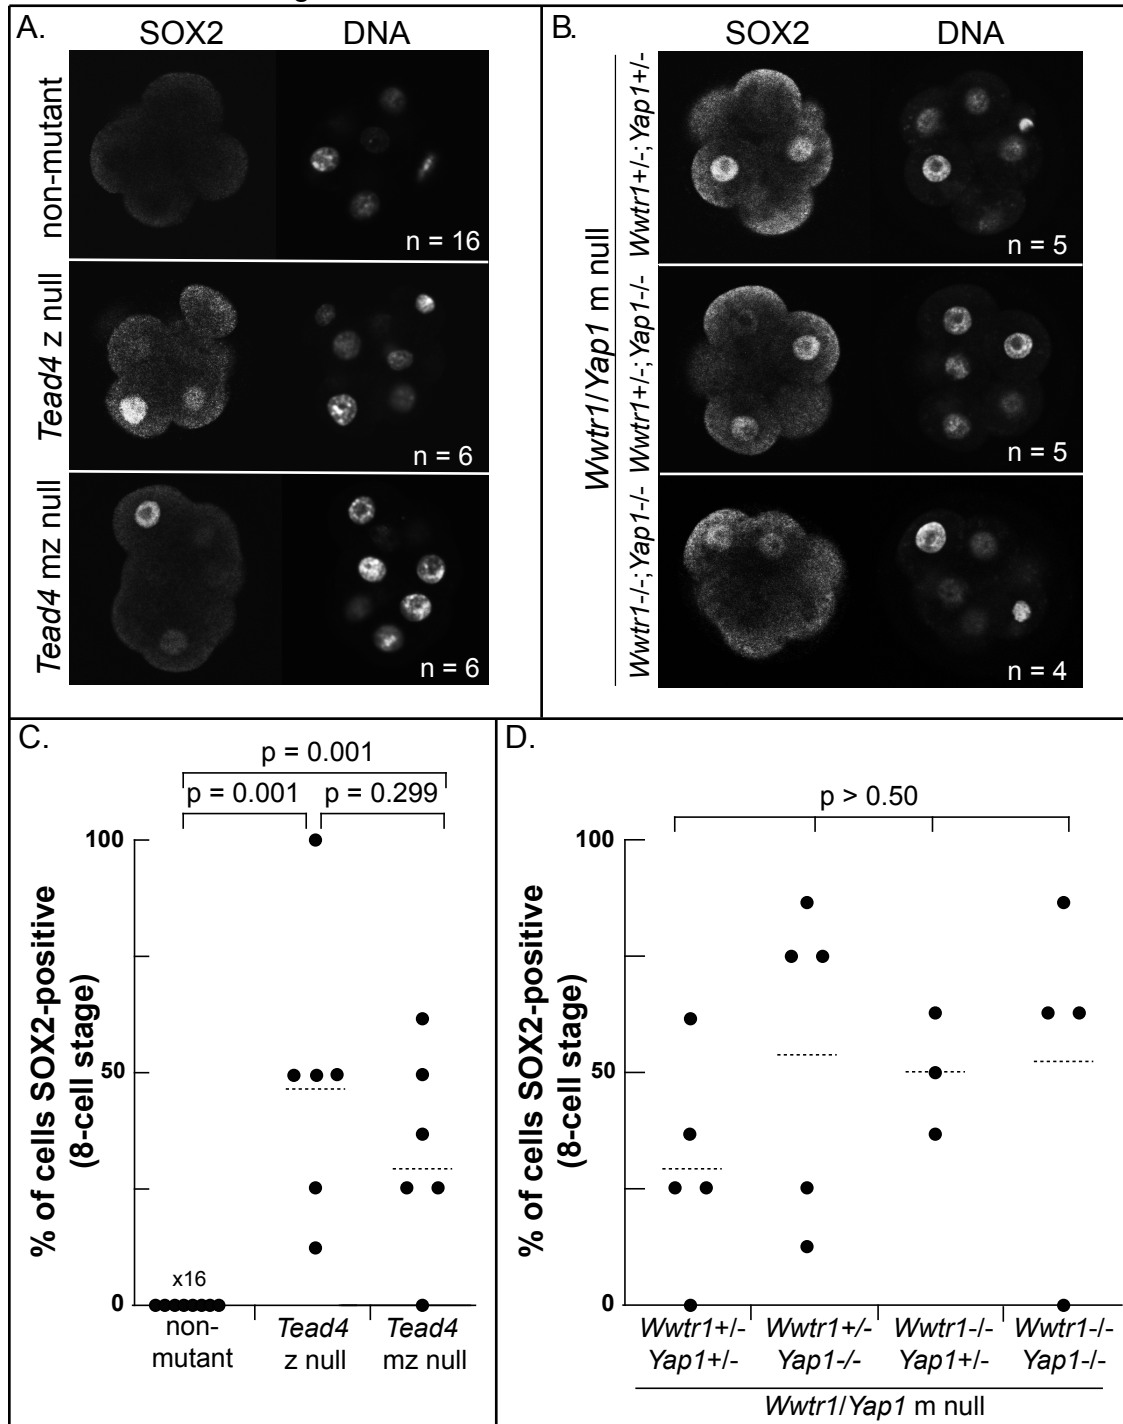

Frum et al., 2019 Figure 3

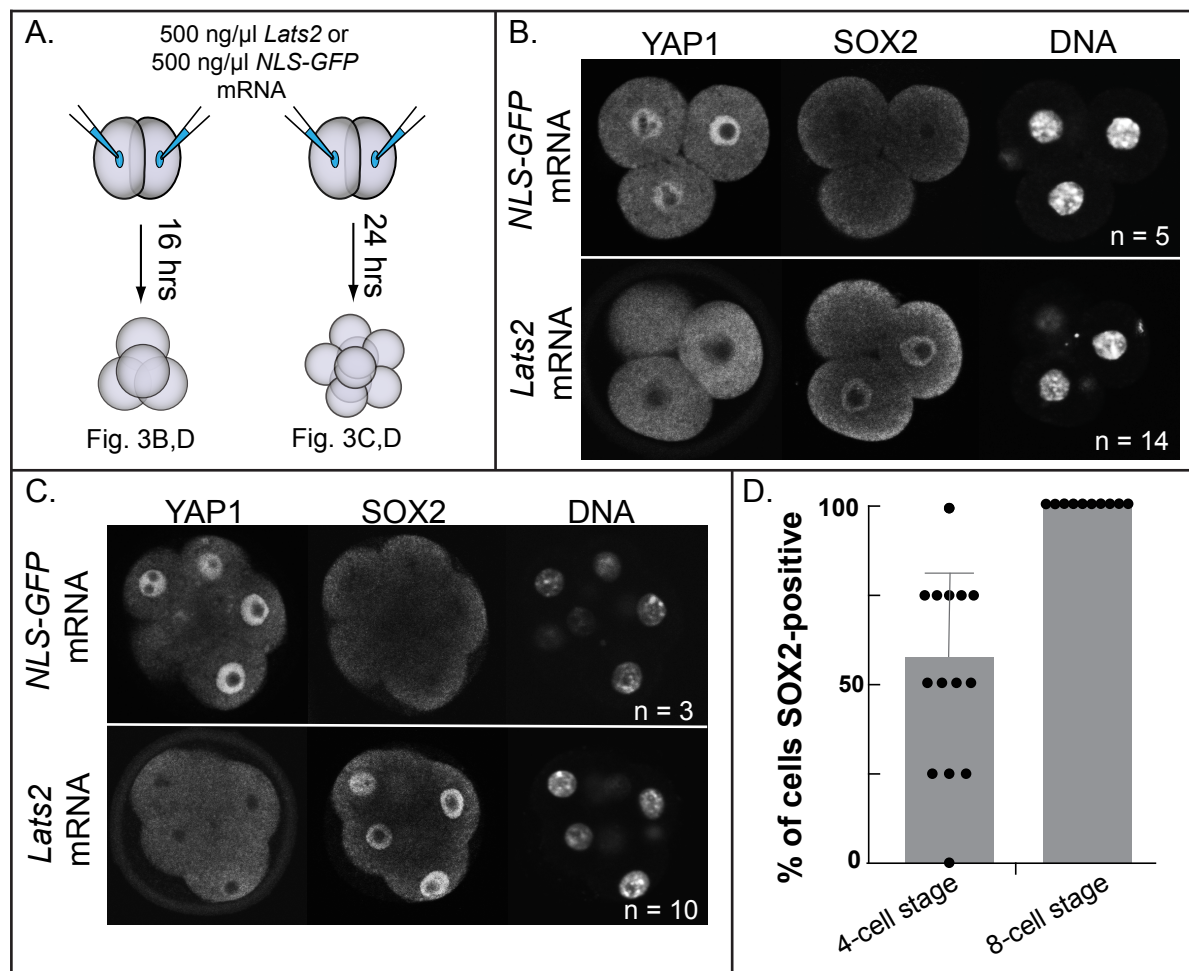

Frum et al., 2019 Figure 4

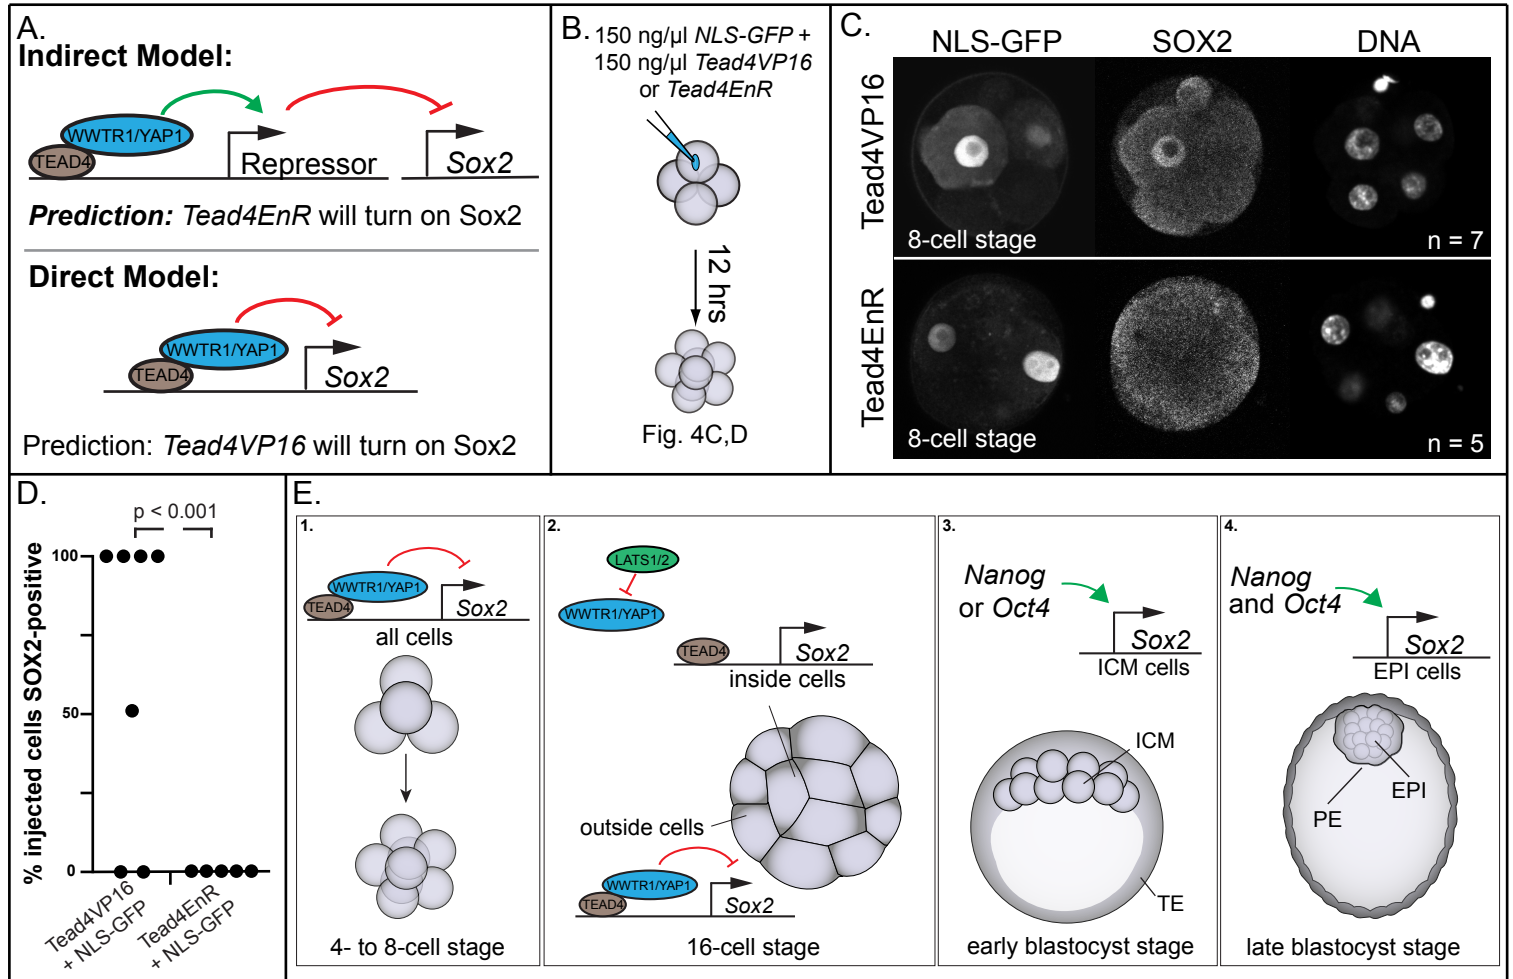

Source: https://www.biorxiv.org/content/10.1101/663005v1.full.pdf
